# Supplementary material
Source: PubMed Central journal article supplement (PMC7673911)
Supplement: NIHMS1643759-supplement-SupplementalInfo.pdf [file NIHMS1643759-supplement-SupplementalInfo.pdf]

## **Near infrared fluorescence ocular imaging (NIRFOI) of Alzheimer's disease**

Jian Yang<sup>1,2,4</sup>, Jing Yang<sup>1,3,4</sup>, Yuyan Li<sup>2</sup>, Yungen Xu<sup>2</sup>, and Chongzhao Ran<sup>1\*</sup>

<sup>1</sup>Molecular Imaging Laboratory, Athinoula A. Martinos Center for Biomedical Imaging, Massachusetts General Hospital and Harvard Medical School, Boston, MA, 02129;

<sup>2</sup>School of Pharmacy, China Pharmaceutical University, Nanjing, 210009;

<sup>3</sup>School of Pharmaceutical Science, Soochow University, Suzhou, 215006, China. <sup>4</sup> These authors contributed equally to this work.

### **Supplemental Information**

#### **Materials and Methods**

Reagents used in this report were purchased from Sigma-Aldrich and used without further purification. Synthetic A $\beta$  peptides (1–40/42) were purchased from rPeptide (Bogart, GA, 30622). The pH of the PBS buffer was 7.4. CRANAD-2, -3, -30, -58, -61, -102 and LDS750 were dissolved in DMSO to prepare 25.0  $\mu$ M stock solutions.

Fluorescence measurements were carried out using an F-4500 fluorescence spectrophotometer (Hitachi). Transgenic female APP-PS1 mice and age matched wild-type female mice were purchased from Jackson Laboratory. NIRFOI was performed on IVIS<sup>®</sup>Spectrum (Perkin Elmer, Hopkinton, MA). All animal experiments were approved by the Institutional Animal Care and Use Committee at Massachusetts General Hospital.

**Fluorescence Spectral Testing of CRANAD-X with A $\beta$ s.** To record the fluorescence response of CRANAD-X in the solution, we utilized the following procedures. Step 1: 1.0 mL of PBS buffer was added to a quartz cuvette as a blank control and its fluorescence was recorded with the same parameters as for CRANAD-X. Step 2: The fluorescence emission spectrum of a CRANAD-X solution (1.0 mL, 250 nM) was recorded with excitation at 560 nm and emission from 580 to 900 nm. Step 3: To the above solution of CRANAD-X 10  $\mu$ L of A $\beta$ s (25  $\mu$ M stock solution) was added to make the final A $\beta$  concentration of 250 nM. The emission spectra of the resulting mixture at different time points were recorded as described in Step 2. The final spectra from steps 2

and 3 were corrected using the blank control from Step 1.

### Supplemental Figures

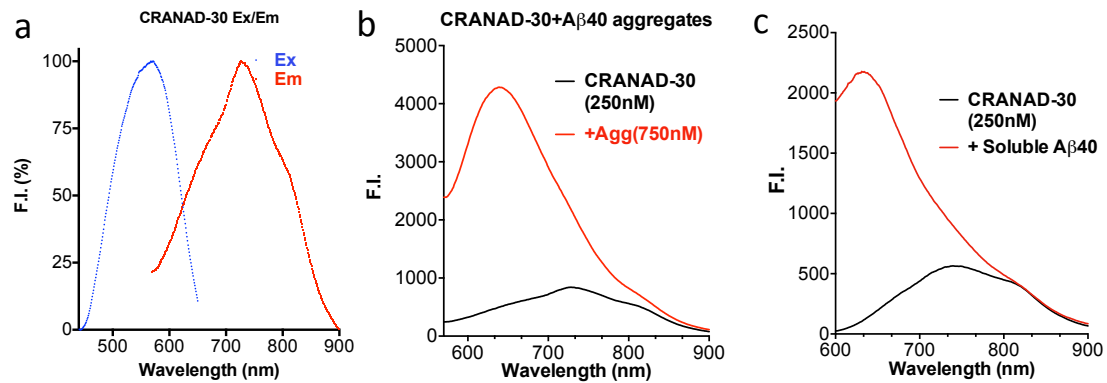

**SI Fig.1** a) Excitation and emission spectra of CRANAD-30, and b-c) Fluorescence intensity and wavelengths changes upon mixing with various Aβs.

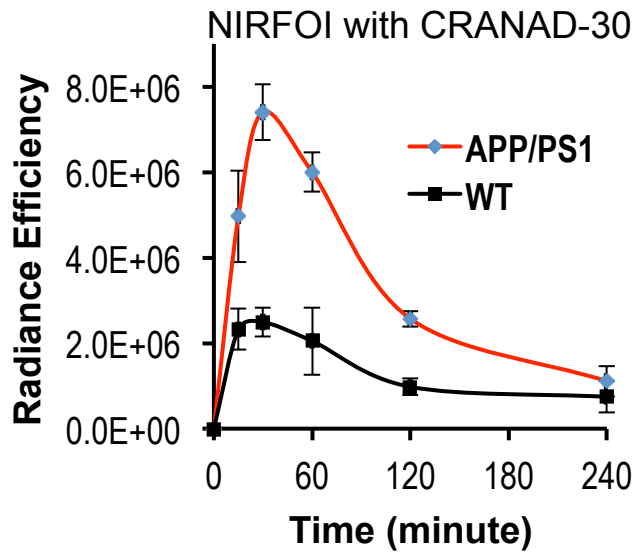

**SI Fig.2** NIRFOI time-course of CRANAD-30 in 14-month old APP/PS1 mice and WT mice.

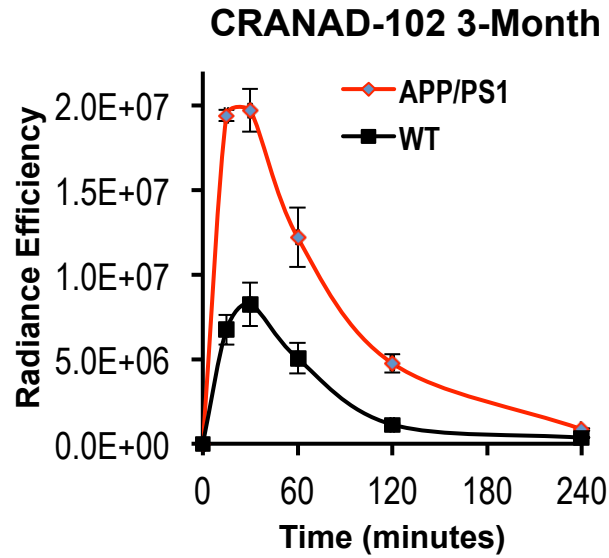

**SI Fig.3** NIRFOI time-course of CRANAD-102 in 4-month old APP/PS1 mice and WT mice.

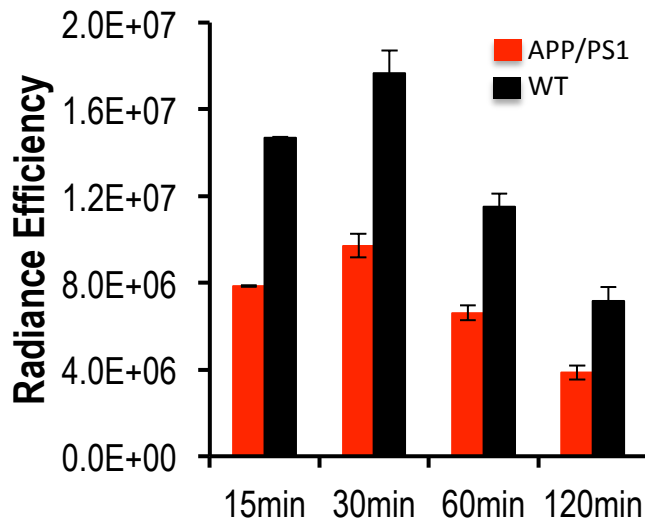

**SI Fig.4** Quantitative analysis of NIRFOI of 14-month old APP/PS1 mice and WT mice with CRANAD-61.
